# Supplementary material
Source: publisher figshare collection journal article supplement (https://acs.figshare.com/ndownloader/files/10473028)
Supplement: Supplementary file 1 [file 10473028]

## Supporting Information

### Decomposition Mechanism of Zinc Ammine Borohydride: A First-Principles Calculation

Xiaowei Chen<sup>†,‡,\*</sup>, Weidong Zou,<sup>§</sup> Renquan Li,<sup>†</sup> Guanglin Xia,<sup>||</sup> and Xuebin Yu<sup>‡,\*</sup>

<sup>†</sup>Department of Physics, School of Science, Jimei University, Xiamen 361021, China

<sup>‡</sup>Department of Materials Science, Fudan University, Shanghai 200433, China

<sup>§</sup>College of Physics and Electromechanical Engineering, Longyan University, Fujian 364012, China

<sup>||</sup>Institute for Superconducting and Electronic Materials, University of Wollongong, North Wollongong, Wollongong, New South Wales 2522, Australia

\* To whom correspondence should be addressed.

E-mail: chenxiaowei@jmu.edu.cn

yuxuebin@fudan.edu.cn

Table S1 The simplified reaction pathway, energy barrier and reaction enthalpy for the decomposition of  $[\text{Zn}(\text{NH}_3)_2][\text{BH}_4]_2$ .  $E_b$  and  $E_b\text{-ZEP}$  are the energy barrier ignoring and including the zero-point energy, respectively.  $\Delta H$  represents the enthalpy ignoring the zero-point energy.  $\Delta H\text{-ZPE}$  and  $\Delta H_{300\text{K}}$  are the calculated enthalpies at  $T=0\text{ K}$  and  $300\text{ K}$ , respectively, including the vibrational energies. The units of enthalpies and entropies are in eV.

| Simplified reaction pathway                                                                                                          | $E_b$ | $E_b\text{-ZEP}$ | $\Delta H$ | $\Delta H\text{-ZPE}$<br>(0K) | $\Delta H_{300\text{K}}$<br>(300K) |
|--------------------------------------------------------------------------------------------------------------------------------------|-------|------------------|------------|-------------------------------|------------------------------------|
| $2\text{BH}_4^- \rightarrow \text{B}_2\text{H}_7^- + \text{H}^-$<br>(IS1 $\rightarrow$ TS4 $\rightarrow$ FS4)                        | 1.58  | 1.52             | 0.56       | 0.63                          | 0.62                               |
| $\text{B}_2\text{H}_7 + \text{NH}_3 \rightarrow \text{BH}_4^- + \text{NH}_3\text{BH}_3$<br>(FS4 $\rightarrow$ TS5 $\rightarrow$ FS5) | 1.15  | 1.30             | -0.55      | -0.39                         | -0.45                              |
| $\text{BH}_4^- + \text{NH}_3 \rightarrow \text{NH}_3\text{BH}_3 + \text{H}^-$<br>(IS $\rightarrow$ TS6 $\rightarrow$ FS6)            | 1.59  | 1.54             | 0.01       | 0.15                          | 0.11                               |
